# Supplementary material for: Concerning the relative importance of enantiomorphic site vs. chain end control in the stereoselective polymerization of lactides: reactions of (R,R-salen)- and (S,S-salen)–aluminium alkoxides LAlOCH2R complexes (R = CH3and S-CHMeCl)
Source: Royal Society of Chemistry journal article supplement (doi:10.1039/b413266a), 2004-11-25
Supplement: b413266a.doc [file b413266a.doc]

Supplementary Information:

Concerning the relative importance of enantiomorphic site versus chain end control in the stereoselective polymerization of lactides: reactions of (*R,R*-salen)- and (*S,S*-salen)-aluminum alkoxides LAlOCH2R complexes (R = CH3 and *S*-CHMeCl)

Malcolm H. Chisholm,* Nathan J. Patmore and Zhiping Zhou

*Department of Chemistry, The Ohio State University, 100 W 18th Ave., Columbus, Ohio 43210, USA.*

**Experimental**

All syntheses and solvent manipulations were carried out under a nitrogen atmosphere using standard Schlenk-line and drybox techniques. Solvents were dried in the standard procedures. Trimethylaluminum (2.0 M solution in hexane, Aldrich), 4-dimethylaminopyridine (Aldrich), (*R,R*)-N,N’-bis(3,5-di-*tert*-butyl-salicylidene)-1,2-cyclohexenediamine (Aldrich), (*S,S*)-N,N’-bis(3,5-di-*tert*-butyl-salicylidene)-1,2-cyclohexenediamine (Aldrich), and (*S*) 2-chloro-1-propanol (Aldrich) were used as received. Lactides (*L* and *rac*, Aldrich) were sublimed three times under reduced pressure prior to use. Deuterated solvents were stored over 4 Å molecular sieves for 24 h prior to use.

*X-ray crystallographic studies.*The data collection crystals for (*R,R*-salen)AlOCH2C(*S*)HMeCl and (*S,S*-salen)AlOCH2C(*S*)HMeCl were both yellow chunks, which had been cut from a large crystal. Examination of the diffraction pattern on a Nonius Kappa CCD diffractometer indicated a monoclinic crystal system. All work was done at 200 K using an Oxford Cryosystems Cryostream Cooler. The data collection strategy was set up to measure a hemisphere of reciprocal space with a redundancy factor of 3.5 for (*R,R*-salen)AlOCH2C(*S*)HMeCl and 4.2 for (*S,S*-salen)AlOCH2C(*S*)HMeCl, which means that 90% of the reflections were measured at least 3.5 and 4.2 times, respectively. A combination of phi and omega scans with a frame width of 1.0 degree was used. Data integration was done with Denzo, and scaling and merging of the data was done with Scalepack.

The structure of (*R,R*-salen)AlOCH2C(*S*)HMeCl was solved in P21 by the direct methods in SHELXS-97. The asymmetric unit contains two molecules of the Al complex. Two of the *t*Bu groups, one on each molecule, are disordered over two positions, and the corresponding carbon atoms were refined with isotropic displacement parameters. All non-hydrogen atoms were refined anistropically.

The structure of (*S,S*-salen)AlOCH2C(*S*)HMeCl was solved in P21 by the direct methods in SHELXS-97. The asymmetric unit contains two molecules of the Al complex. Two of the *t*Bu groups, one on each molecule, are disordered over two positions, and the corresponding carbon atoms were refined with isotropic displacement parameters. All non-hydrogen atoms were refined anistropically.

Experimental data relating to both structure determinations are displayed in Table S1. Selected bond distances and angles for (*R,R*-salen)AlOCH2C(*S*)HMeCl and (*S,S*-salen)AlOCH2C(*S*)HMeCl are summarized in Table S2. CCDC 243022 and CCDC 246786 contain the supplementary crystallographic data for (*R,R*-salen)AlOCH2C(*S*)HMeCl and (*S,S*-salen)AlOCH2C(*S*)HMeCl, respectively. These data can be obtained free of charge via www.ccdc.cam.ac.uk/data_request/cif, by emailing [data_request@ccdc.cam.ac.uk](mailto:data_request@ccdc.cam.ac.uk).

*Synthesis of (R,R-salen) aluminum ethoxide.* To a solution of (*R,R*-salen)H2 (1.0 g, 1.8 mmol) in 20 mL of dichloromethane was added a solution of trimethylaluminum (AlMe3 2.0 M solution in hexane, 1.1 mL, 2.2 mmol), and the mixture was stirred for 3 h at room temperature. A yellow powder was obtained after the removal of volatile fractions under vacuum. The powder was redissolved in hexane, followed by the addition of 0.2 mL of ethanol (3.4 mmol), stirred for 3 h. A yellow precipitate was obtained as the product in 75% yield. 1H NMR (CDCl3, , ppm): 0.85 (t, C*H*3-CH2), 3.45 (m, CH3C*H*2), 1.29 (d, C(C*H*3)), 1.53 (d, C(C*H*3)), 1.44, 2.06, 2.42, 2.58, 3.05, 3.83 (cyclohexyl), 6.99, 7.04, 7.47, 7.50 (aromatic), 8.15, 8.35 (*H*C=N). 13C{1H} NMR (CDCl3, , ppm): 20.80 (*C*H3CH2), 23.76, 24.29, 27.28, 28.85 (*C*H2 in cyclohexyl), 29.71, 29.93, 31.39, 31.45 ((*C*H3)3C), 33.95, 33.98, 35.58, 35.66 ((CH3)3*C*), 57.66(H2*C*-O), 62.63, 65.78 (H*C*-N), 118.15, 118.40, 127.29, 127.70, 129.66, 130.90, 137.53, 138.05, 140.66, 140.86, 162.42, 164.23 (phenyl), 162.86, 167.95 (H*C*=N). Elemental analysis: Calcd.: C, 73.99; H, 9.31; N, 4.54. Found: C, 73.48; H, 9.33; N, 4.48%.

*Synthesis of (S,S-salen) aluminum ethoxide.* To a solution of (*S,S*-salen)H2 (1.0 g, 1.8 mmol) in 20 mL of dichloromethane was added a solution of trimethylaluminum (AlMe3 2.0 M solution in hexane, 1.1 mL, 2.2 mmol), and the mixture was stirred for 3 h at room temperature. A yellow powder was obtained after the removal of volatile fractions under vacuum. The powder was redisolved in hexane, followed by the addition of 0.2 mL of ethanol (3.4 mmol), stirred for 3 h. A yellow precipitate was obtained as the product in 73% yield. 1H NMR (CDCl3, , ppm): 0.85 (t, C*H*3-CH2), 3.44 (m, CH3C*H*2), 1.29 (d, C(C*H*3)), 1.53 (d, C(C*H*3)), 1.44, 2.06, 2.43, 2.58, 3.05, 3.83 (cyclohexyl), 6.99, 7.04, 7.48, 7.50 (aromatic), 8.15, 8.35 (*H*C=N). 13C{1H} NMR (CDCl3, , ppm): 20.80 (*C*H3CH2), 23.76, 24.29, 27.28, 28.85 (*C*H2 in cyclohexyl), 29.71, 29.93, 31.39, 31.45 ((*C*H3)3C), 33.95, 33.98, 35.58, 35.66 ((CH3)3*C*), 57.66(H2*C*-O), 62.63, 65.78 (H*C*-N), 118.15, 118.40, 127.29, 127.70, 129.66, 130.90, 137.53, 138.05, 140.65, 140.86, 162.42, 164.23 (phenyl), 162.86, 167.95 (H*C*=N). Elemental analysis: Calcd.: C, 73.99; H, 9.31; N, 4.54. Found: C, 73.25; H, 9.24; N, 4.42%.

*Synthesis* of *(R,R-salen)AlOCH2C(S)HMeCl.* To a solution of (*R,R*-salen)H (1.0 g, 1.8 mmol) in 20 mL of dichloromethane was added a solution of trimethylaluminum (AlMe3 2.0 M solution in hexane, 1.1 mL, 2.2 mmol), and the mixture was stirred for 3 h at room temperature. A yellow powder was obtained after the removal of volatile fractions under vacuum. The powder was redisolved in hexane, followed by the addition of 0.19 mL of (*S*) 2-chloro-1-propanol (2.2 mmol), stirred for 3 h. A yellow precipitate was obtained as the product in 75% yield. Crystals of this complex were obtained by slow evaporation of the solvent from a concentrated benzene solution of the complex.. 1H NMR (CDCl3, , ppm): 1.17 (d, C*H*3-CHCl) 3.40, 3.50 (m, OC*H*2), 3.68 (m, C*H*Cl), 1.29 (d, C(C*H*3)), 1.51 (d, C(C*H*3)), 1.44, 2.07, 2.43, 2.58, 3.06, 3.90 (cyclohexyl), 7.00, 7.05, 7.48, 7.51 (aromatic), 8.17, 8.35 (*H*C=N). 13C{1H} NMR (CDCl3, , ppm): 21.43 (*C*H3CH), 23.75, 24.27, 27.27, 28.80 (*C*H2 in cyclohexyl), 29.67, 29.94, 31.36, 31.43 ((*C*H3)3C), 33.96, 33.99, 35.56, 35.64 ((CH3)3*C*), 61.10, 62.64 (H*C*-N), 65.86 (H*C*-Cl), 69.25(H2*C*-O), 118.12, 118.35, 127.37, 127.75, 129.84, 131.11, 137.82, 138.29, 140.59, 140.79, 162.27, 163.92 (phenyl), 163.02, 168.19 (H*C*=N). Elemental analysis: Calcd.: C, 70.41; H, 8.79; N, 4.21. Found: C, 69.16; H, 8.44; N, 4.03%.

*Synthesis of (S,S-salen)AlOCH2C(S)HMeCl.* To a solution of (*S,S*-salen)H2 (1.0 g, 1.8 mmol) in 20 mL of dichloromethane was added a solution of trimethylaluminum (AlMe3 2.0 M solution in hexane, 2.2 mL, 2.2 mmol), and the mixture was stirred for 3 h at room temperature. A yellow powder was obtained after the removal of volatile fractions under vacuum. The powder was redisolved in hexane, followed by the addition of 0.19 mL of (*S*) 2-chloro-1-propanol (2.2 mmol), stirred for 3 h. A yellow precipitate was obtained as the product in 70% yield. Crystals of this complex were obtained by slowly evaporation of the solvent from a concentrated benzene solution of the complex. 1H NMR (CDCl3, , ppm): 1.22 (d, C*H*3-CHCl), 3.46 (m, OC*H*2), 3.69 (m, C*H*Cl), 1.29 (d, C(C*H*3)), 1.52 (d, C(C*H*3)), 1.44, 2.06, 2.43, 2.58, 3.06, 3.93 (cyclohexyl), 7.00, 7.05, 7.48, 7.51 (aromatic), 8.17, 8.36 (*H*C=N). 13C{1H} NMR (CDCl3, , ppm): 21.40 (*C*H3CH), 23.78, 24.30, 27.28, 28.74 (*C*H2 in cyclohexyl), 29.67, 29.97, 31.38, 31.43 ((*C*H3)3C), 33.97, 34.00, 35.57, 35.65 ((CH3)3*C*), 61.52 (H*C*-Cl), 62.55, 65.87(H*C*-N), 69.56(H2*C*-O), 118.18, 118.33, 127.41, 127.79, 129.84, 131.05, 137.75, 138.33, 140.54, 140.83, 162.19, 164.00 (phenyl), 163.00, 168.28 (H*C*=N). Elemental analysis: Calcd.: C, 70.41; H, 8.79; N, 4.21. Found: C, 69.64; H, 8.73; N, 4.02%.

*Ring-opening reactions of 1 equiv of lactides.* 20 mg of lactide (*L* or *rac*, 0.14 mmol) and 5 mg of (salen)AlOCH2R (~0.008 mmol) were dissolved in 1 mL of solvent in a J-Young NMR tube and allowed to react at room temperature for 12 h in the cases of (salen)AlOCH2CH3, or 3 d in the cases of (salen)AlOCH2CHMeCl. The solvent was removed under vacuum, and the resulting mixture was redissolved in 1 mL of CDCl3 for 1H NMR measurement. The products in the reactions of *L*-lactide and all those four (salen)AlOCH2R complexes were analyzed by 1H NMR as references for identifying products in the reactions involving *rac*-lactide.

*Ring-opening polymerization reactions of rac-lactide.*Typically (salen)AlOCH2R (20 mg, 0.03 mmol) and *rac*-lactide (0.45 g, 3.1 mmol) were allowed to react in 15 mL of toluene at 80oC for 10 d, yielding polylactide with 40% conversion. The obtained polymers were analyzed by NMR and GPC (M*n* = 9 000 to 11 000 Da, PDI = 1.13 to 1.16).

**Table S1** Crystallographic details for (*R,R*-salen)AlOCH2C(*S*)HMeCl and (*S,S*-salen)AlOCH2C(*S*)HMeCl.

|  | (*R,R*)-*S* | (*S,S*)-*S* |
| --- | --- | --- |
| Empirical formula | C39H58AlClN2O3 | C39H58AlClN2O3 |
| Formular weight | 665.30 | 665.30 |
| Temperature (K) | 200 | 200 |
| Wavelenghth (Å) | 0.71073 | 0.71073 |
| Crystal system | monoclinic | monoclinic |
| Space group | P21 | P21 |
| Unit cell dimensions |  |  |
| a (Å) | 14.923(1) | 14.927(1) |
| b (Å) | 11.021(1) | 10.941(1) |
| c (Å) | 23.440(1) | 23.393(1) |
| ß (o) | 93.397(1) | 93.69(1) |
| V (Å3) | 3848.6(7) | 3812.5(7) |
| Z | 4 | 4 |
| Dcalc (mg m-3) | 1.148 | 1.159 |
| Absorption coefficient (mm-1) | 0.159 | 0.160 |
| F(000) | 1440 | 1440 |
| Crystal size (mm-3) | 0.38x0.19x0.15 | 0.38x0.31x0.27 |
| Theta range for data collection (o) | 1.58-22.99 | 1.57-25.03 |
| Index ranges | -16≤h≤16, -12≤k≤12,  -25≤l≤25 | -17≤h≤17, -13≤k≤12,  -27≤l≤27 |
| Reflections collected | 60183 | 60079 |
| Independent reflections | 10692[Rint=0.073] | 13387[Rint=0.058] |
| Refinement method | Full-matrix least-squares on F2 | Full-matrix least-squares on F2 |
| Data/restraints/parameters | 10692/1/886 | 13387/1/826 |
| Flack parameter | 0.00(9) | 0.00(8) |
| Goodness-of-fit on F2 | 1.021 | 1.020 |
| Final R indices [I>2σ(I)] | R1=0.0508, wR2=0.1237 | R1=0.0555, wR2=0.1321 |
| R indices (all data) | R1=0.0749, wR2=0.1364 | R1=0.0852, wR2=0.1467 |
| Largest difference peak and hole (e/Å3) | 0.412 and -0.506 | 0.565 and -0.371 |

**Table S2** Selected bond distances (Å) and angles (deg) for (*R,R*-salen)AlOCH2C(*S*)HMeCl and (*S,S*-salen)AlOCH2C(*S*)HMeCl. (The atom numbers are corresponding to Fig. 1)

| (*R,R*)-*S* | | (*S,S*)-*S* | |
| --- | --- | --- | --- |
| Al1─O1 | 1.797(3) | Al2─O5 | 1.798(3) |
| Al1─O2 | 1.804(3) | Al2─O6 | 1.820(3) |
| Al1─O3 | 1.746(3) | Al2─O4 | 1.748(3) |
| Al1─N1 | 2.021(3) | Al2─N3 | 2.004(3) |
| Al1─N2 | 1.999(3) | Al2─N4 | 2.010(3) |
| O3─C38 | 1.377(6) | O4─C76 | 1.401(5) |
| C38─C39 | 1.501(7) | C76─C77 | 1.488(6) |
| C39─C40 | 1.497(7) | C77─C78 | 1.504(7) |
| Cl1─C39 | 1.809(5) | Cl2─C77 | 1.811(4) |
|  |  |  |  |
| O3─Al1─O1 | 109.7(1) | O4─Al2─O5 | 111.0(1) |
| O3─Al1─O2 | 107.2(1) | O4─Al2─O6 | 106.5(1) |
| O3─Al1─N1 | 96.5(1) | O4─Al2─N3 | 97.0(1) |
| O3─Al1─N2 | 104.3(1) | O4─Al2─N4 | 103.2(1) |
| O1─Al1─O2 | 89.8(1) | O5─Al2─O6 | 89.8(1) |
| O1─Al1─N1 | 88.8(1) | O5─Al2─N3 | 88.8(1) |
| O1─Al1─N2 | 144.9(2) | O5─Al2─N4 | 144.9(1) |
| O2─Al1─N2 | 88.2(1) | O6─Al2─N4 | 88.2(1) |
| O2─Al1─N1 | 155.2(1) | O6─Al2─N3 | 155.3(1) |
| N1─Al1─N2 | 78.9(1) | N3─Al2─N4 | 79.0(1) |
| C38─O3─Al1 | 127.3(3) | C76─O4─Al2 | 124.4(3) |
| O3─C38─C39 | 113.6(4) | O4─C76─C77 | 113.0(4) |
| C38─C39─C40 | 112.6(5) | C76─C77─C78 | 112.0(4) |
| C38─C39─Cl1 | 110.2(3) | C76─C77─Cl2 | 111.0(3) |
| C40─C39─Cl1 | 111.5(4) | C78─C77─Cl2 | 111.4(3) |

**Scheme S1** Ring opening of 1 equiv of lactide by (salen)AlOCH2R (R = CH3, or C(*S*)HMeCl).


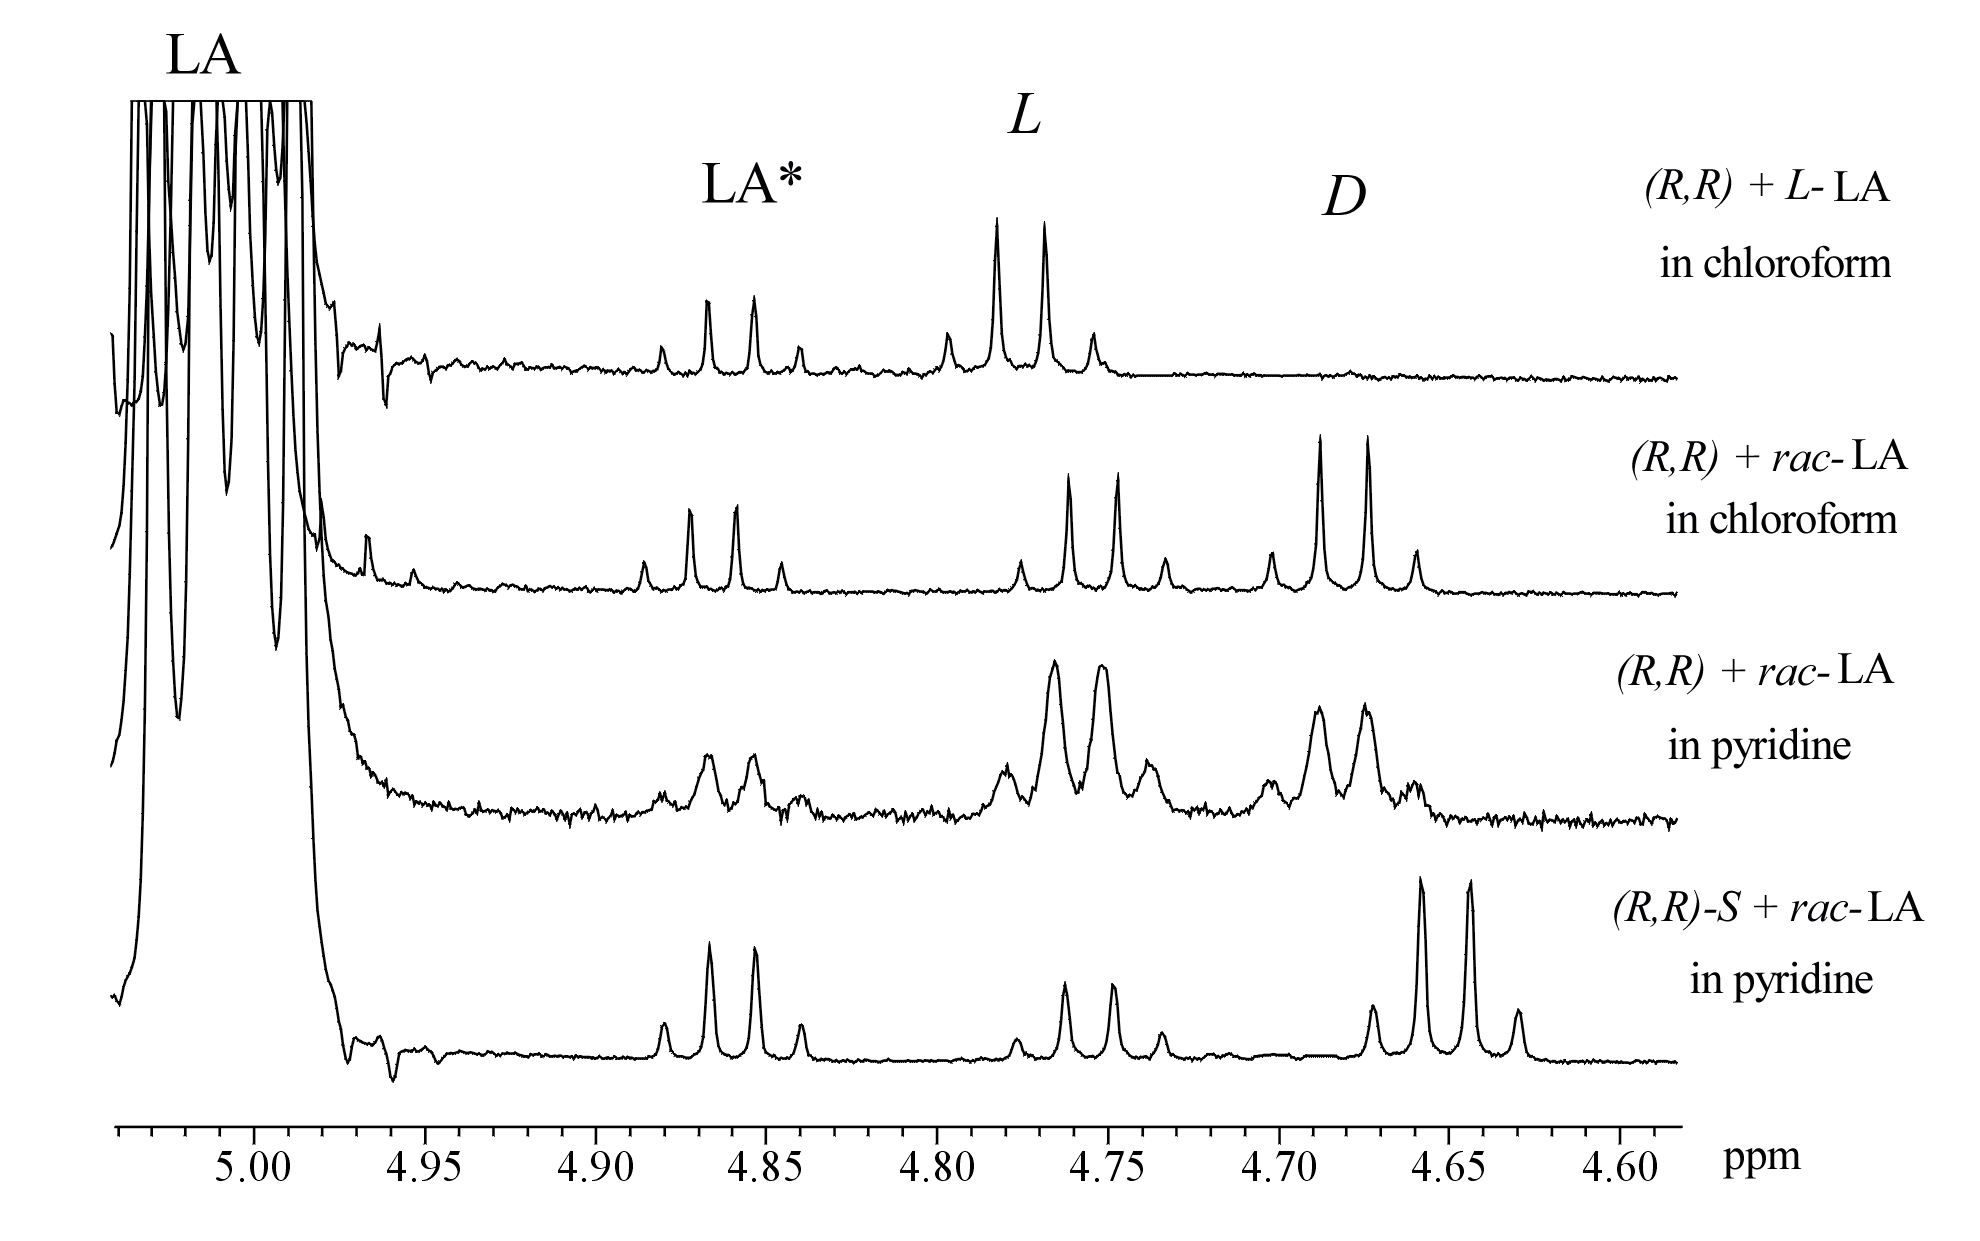


**Fig. S1** Selected 1H (500MHz, CDCl3) NMR spectra showing methine proton region (H*b* in Scheme S1) in the products in ring-opening reactions of 1 equiv of lactide by (salen)AlOCH2R. LA, unreacted lactide; LA*, LA satellite signals; *L*, *L*-LA ring opened product; *D*, *D*-LA ring opened product.

**Fig. S2** 1H (500MHz, CDCl3) NMR spectra of the homodecoupled methine proton (C*H*) resonance of poly(*rac-*lactide) prepared in toluene using: (A) (*R,R*-salen)AlOCH2CH3, (B) (*R,R*-salen)AlOCH2C(*S*)HMeCl, and (C) (*S,S*-salen)AlOCH2C(*S*)HMeCl.
